# Supplementary material
Source: PubMed Central journal article supplement (PMC2967046)
Supplement: NIHMS201354-supplement-01.pdf [file NIHMS201354-supplement-01.pdf]

**Supplemental Table S1. Identified proteins categorized according to disease or function from Fig. 5.****Cancer**

10 kDa heat shock protein, mitochondrial (P61604); 14-3-3 protein epsilon (P62258); 14-3-3 protein gamma (P61981); 40S ribosomal protein SA (P08865); 78 kDa glucose-regulated protein precursor (P11021); Acidic leucine-rich nuclear phosphoprotein 32 family member A (P39687); Actin, cytoplasmic 1 (beta actin) (P60709); Actin, cytoplasmic 2 (Gamma-actin) (P63261); Actin-related protein 2/3 complex subunit 5-like protein (O15511); Alpha-1-antitrypsin precursor (P01009); Alpha-enolase (P06733); Alpha-soluble NSF attachment protein (P54920); Annexin A1 (P04083); Annexin A2 (P07355); Annexin A4 (P09525); Annexin A5 (P08758); Apoptosis-associated speck-like protein containing a CARD (Q9ULZ3); Arachidonate 15-lipoxygenase (P16050); ATP-dependent DNA helicase 2 subunit 1 (P12956); Beta-2-microglobulin precursor (P61769); Beta-galactosidase precursor (P16279); Calreticulin precursor (P27797); Carbonic anhydrase 2 (P00918); Carbonyl reductase [NADPH] 1 (P16152); Caspase-3 precursor (P42574); Catalase (P04040); Cathepsin D precursor (P07339); CD97 antigen precursor (Leukocyte antigen CD97) (P48960); Cell division control protein 42 homolog precursor (P60953); Coactosin-like protein (Q14019); Crk-like protein (P46109); Dextrin (P60981); Dipeptidyl-peptidase 1 precursor (P53634); Dipeptidyl-peptidase 3 (Q9NY33); Docking protein 2 (O60496); Elongation factor 2 (P13639); Endoplasmic precursor (P14625); Far upstream element-binding protein 1 (Q96AE4); Ferritin light chain (P02792); Fructose-bisphosphate aldolase A (Q9UCN2); Galectin-3 (P17931); Gelsolin precursor (P06396); Glucose-6-phosphate 1-dehydrogenase (P11413); Glucose-6-phosphate isomerase (P06744); Glutathione peroxidase 1 (P07203); Glutathione S-transferase omega-1 (P78417); Glutathione S-transferase P (P09211); Glutathione synthetase (P48637); Glyceraldehyde-3-phosphate dehydrogenase (P04406); GTP-binding nuclear protein Ran (P62826); Guanine nucleotide-binding protein G(i), alpha-2 subunit (P04899); Guanine nucleotide-binding protein subunit beta-2-like 1 (P63244); Heat shock 70 kDa protein 4 (P34932); Heat shock cognate 71 kDa protein (P11142); Heat shock protein HSP 90-alpha (P07900); Heat shock protein HSP 90-beta (P08238); Hemoglobin subunit delta (P02042); Heterogeneous nuclear ribonucleoprotein A1 (P09651); Heterogeneous nuclear ribonucleoprotein H (P31943); High mobility group protein B1 (P09429); Histone H2A.x (P16104); Integrin alpha-M precursor (P11215); Integrin beta-2 precursor (P05107); Keratin, type I cytoskeletal 10 (P13645); Lactotransferrin precursor (P02788); Lactoylglutathione lyase (Q04760); Lamin-B1 (P20700); Leukocyte elastase inhibitor (P30740); Leukocyte elastase precursor (P08246); LIM and SH3 domain protein 1 (Q14847); Liver carboxylesterase 1 precursor (P23141); L-lactate dehydrogenase A chain (P00338); Lysozyme C precursor (P61626); Macrophage migration inhibitory factor (P14174); Macrophage-capping protein (P40121); Mitogen-activated protein kinase 1 (P28482); Mitotic checkpoint protein BUB3 (O43684); Moesin (P26038); Myeloblastin precursor (P24158); Neutrophil gelatinase-associated lipocalin precursor (P80188); Nucleoside diphosphate kinase A (P15531); Nucleoside diphosphate kinase B (P22392); Peptidyl-prolyl cis-trans isomerase A (P62937); Peroxiredoxin-2 (P32119); Phosphatidylethanolamine-binding protein 1 (P30086); Phosphoglycerate kinase 1 (P00558); Plastin-2 (P13796); Profilin-1 (P07737); Prohibitin (P35232); Proliferating cell nuclear antigen (P12004); Proteasome subunit beta type-9 precursor (P28065); Protein diaphanous homolog 1 (O60610); Protein disulfide-isomerase precursor (P07237); Protein S100-A11 (P31949); Protein S100-A4 (P26447); Protein S100-A8 (P05109); Protein S100-A8 (P06702); Purine nucleoside phosphorylase (P00491); Replication protein A 70 kDa DNA-binding subunit (P27694); Rho GDP-dissociation inhibitor 1 (P52565); Rho GDP-dissociation inhibitor 2 (P52566); Serine/threonine-protein phosphatase 2A 65 kDa regulatory subunit A alpha isoform (P30153); Serine/threonine-protein phosphatase 2A catalytic subunit alpha isoform (P67775); Serine/threonine-protein phosphatase PP1-alpha catalytic subunit (P62136); Serpin B10 (P48595); Serum albumin precursor (P02768); Spliceosome RNA helicase BAT1 (Q13838); Stathmin (P16949); Stress-induced-phosphoprotein 1 (P38646); Superoxide dismutase [Mn], mitochondrial precursor (P04179); T-complex protein 1 subunit alpha (P17987); T-complex protein 1 subunit epsilon (P48643); Thioredoxin (P10599); Thioredoxin reductase 1, cytoplasmic (Q16881); Transforming protein RhoA precursor (P61586); Translationally-controlled tumor protein (P13693); Triosephosphate isomerase (P60174); Tubulin beta chain (P68363); Tyrosine-protein kinase CSK (P41240); Tyrosine-protein phosphatase non-receptor type 6 (P29350); Ubiquitin-conjugating enzyme E2 variant 1 (Q13404); Ubiquitin-like modifier-activating enzyme 1 (P22314); Vasodilator-stimulated phosphoprotein (P50552); Vimentin (P08670); Voltage-dependent anion-selective channel protein 1 (P21796)

**Supplemental Table S1 (Continued). Identified proteins categorized according to disease or function from Fig. 5.****Cell Death**

10 kDa heat shock protein, mitochondrial (P61604); 14-3-3 protein beta/alpha (P31946); 14-3-3 protein epsilon (P62258); 14-3-3 protein theta (P27348); 14-3-3 protein zeta/delta (P63104); 3-hydroxyacyl-CoA dehydrogenase type-2 (Q99714); 78 kDa glucose-regulated protein precursor (P11021); Adenine phosphoribosyltransferase (P07741); Aldehyde dehydrogenase, mitochondrial precursor (P05091); Alpha-enolase (P06733); Alpha-soluble NSF attachment protein (P54920); Annexin A1 (P04083); Annexin A4 (P09525); Annexin A5 (P08758); Annexin A7 (P20073); Apoptosis-associated speck-like protein containing a CARD (Q9ULZ3); Arachidonate 15-lipoxygenase (P16050); ATP-dependent DNA helicase 2 subunit 1 (P12956); Azurocidin precursor (P20160); Beta-2-microglobulin precursor (P61769); Biliverdin reductase A (P53004); Bone marrow proteoglycan precursor Contains: Eosinophil granule major basic protein (P13727); Calpain small subunit 1 (P04632); Calreticulin precursor (P27797); Caspase-3 precursor (P42574); Catalase (P04040); Cathepsin D precursor (P07339); Cell division control protein 42 homolog precursor (P60953); Cofilin-1 (P23528); DCC-interacting protein 13-alpha (Q9UKG1); Dipeptidyl-peptidase 3 (Q9NY33); Dynamin-2 (P50570); Elongation factor 1-alpha 1 (P68104); Elongation factor 2 (P13639); Endoplasmic precursor (P14625); Eosinophil cationic protein precursor (P12724); Eosinophil peroxidase precursor (P11678); Eukaryotic translation initiation factor 5A-1 (P63241); Ezrin (P15311); Far upstream element-binding protein 1 (Q96AE4); Galectin-3 (P17931); Gelsolin precursor (P06396); Glucose-6-phosphate 1-dehydrogenase (P11413); Glucose-6-phosphate isomerase (P06744); Glutathione peroxidase 1 (P07203); Glutathione reductase, mitochondrial precursor (P00390); Glutathione S-transferase P (P09211); Glyceraldehyde-3-phosphate dehydrogenase (P04406); Growth factor receptor-bound protein 2 (P62993); Guanine nucleotide-binding protein G(o) subunit alpha (P08754); Guanine nucleotide-binding protein subunit beta-2-like 1 (P63244); Heat shock cognate 71 kDa protein (P11142); Heat shock protein HSP 90-beta (P08238); Heterogeneous nuclear ribonucleoprotein A1 (P09651); High mobility group protein B1 (P09429); Integrin alpha-M precursor (P11215); Integrin beta-2 precursor (P05107); Lactoylglutathione lyase (Q04760); Lamin-B1 (P20700); Leukocyte elastase precursor (P08246); L-lactate dehydrogenase A chain (P00338); Macrophage migration inhibitory factor (P14174); Mitogen-activated protein kinase 1 (P28482); Moesin (P26038); Myeloblastin precursor (P24158); Myeloperoxidase precursor (P05164); Myosin-11 (P35749); NEDD8-activating enzyme E1 regulatory subunit (Q13564); Neutrophil cytosol factor 2 (P19878); Neutrophil gelatinase-associated lipocalin precursor (P80188); Nucleoside diphosphate kinase A (P15531); Nucleoside diphosphate kinase B (P22392); Peptidyl-prolyl cis-trans isomerase A (P62937); Peroxiredoxin-1 (Q06830); Peroxiredoxin-2 (P32119); Peroxiredoxin-5, mitochondrial precursor (P30044); Phosphatidylethanolamine-binding protein 1 (P30086); Phospholipid hydroperoxide glutathione peroxidase, mitochondrial precursor (P36969); Platelet-activating factor acetylhydrolase IB subunit alpha (P43034); Prohibitin (P35232); Proliferating cell nuclear antigen (P12004); Protein disulfide-isomerase A3 (P30101); Protein disulfide-isomerase precursor (P07237); Protein S100-A4 (P26447); Protein S100-A8 (P05109); Protein S100-A8 (P06702); Purine nucleoside phosphorylase (P00491); Replication protein A 70 kDa DNA-binding subunit (P27694); Rho GDP-dissociation inhibitor 1 (P52565); Serine/threonine-protein phosphatase 2A 65 kDa regulatory subunit A alpha isoform (P30153); Serine/threonine-protein phosphatase 2A catalytic subunit alpha isoform (P67775); Serine/threonine-protein phosphatase PP1-alpha catalytic subunit (P62136); Serpin B10 (P48595); Serum albumin precursor (P02768); Stathmin (P16949); Stress-induced-phosphoprotein 1 (P38646); Succinate dehydrogenase [ubiquinone] flavoprotein subunit, mitochondrial precursor (P31040); Superoxide dismutase [Mn], mitochondrial precursor (P04179); Thioredoxin (P10599); Thioredoxin reductase 1, cytoplasmic (Q16881); Thioredoxin-dependent peroxide reductase, mitochondrial (P30048); Thioredoxin-like protein 1 (O43396); Transitional endoplasmic reticulum ATPase (P55072); Translationally-controlled tumor protein (P13693); Transthyretin precursor (P02766); Tropomyosin alpha-3 chain (P06753); Tyrosine-protein kinase CSK (P41240); Tyrosine-protein phosphatase non-receptor type 6 (P29350); Tyrosyl-tRNA synthetase, cytoplasmic (P54577); Ubiquitin-conjugating enzyme E2 variant 1 (Q13404); Ubiquitin-like modifier-activating enzyme 1 (P22314); Vinculin (P18206); Voltage-dependent anion-selective channel protein 1 (P21796)

**Supplemental Table S1 (Continued). Identified proteins categorized according to disease or function from Fig. 5.****Cell Signaling**

Actin, cytoplasmic 2 (Gamma-actin) (P63261); Actin-related protein 2 (P61160); Actin-related protein 2/3 complex subunit 1B (O15143); Actin-related protein 2/3 complex subunit 2 (O15144); Actin-related protein 2/3 complex subunit 3 (O15145); Actin-related protein 2/3 complex subunit 4 (P59998); Actin-related protein 2/3 complex subunit 5-like protein (O15511); Actin-related protein 3 (P61158); ADP-ribosylation factor 1 (P84077); ADP-ribosylation factor 3 (P61204); Alpha-actinin-1 (P12814); Alpha-actinin-4 (O43707); Annexin A1 (P04083); Annexin A7 (P20073); Calpain small subunit 1 (P04632); Cell division control protein 42 homolog precursor (P60953); Crk-like protein (P46109); Docking protein 2 (O60496); Elongation factor 1-alpha 1 (P68104); Growth factor receptor-bound protein 2 (P62993); Guanine nucleotide-binding protein G(i), alpha-2 subunit (P04899); Guanine nucleotide-binding protein G(o) subunit alpha (P08754); Integrin alpha-M precursor (P11215); Integrin beta-2 precursor (P05107); Macrophage migration inhibitory factor (P14174); Mitogen-activated protein kinase 1 (P28482); Myosin regulatory light chain (P19105); Ras-related C3 botulinum toxin substrate 2 precursor (P15153); Ras-related protein Rap-1b precursor (P61224); Rho GTPase-activating protein 1 (Q07960); Serine/threonine-protein phosphatase PP1-alpha catalytic subunit (P62136); Serine/threonine-protein phosphatase PP1-beta catalytic subunit (P62140); Serum albumin precursor (P02768); Talin-1 (Q9Y490); Transforming protein RhoA precursor (P61586); Tyrosine-protein phosphatase non-receptor type 6 (P29350); Vasodilator-stimulated phosphoprotein (P50552); Vinculin (P18206)

**Cell-To-Cell Signaling and Interaction**

40S ribosomal protein SA (P08865); Actin-related protein 3 (P61158); Adenosylhomocysteinase (P23526); AH receptor-interacting protein (O00170); Annexin A1 (P04083); Annexin A2 (P07355); Annexin A5 (P08758); Arachidonate 15-lipoxygenase (P16050); Azurocidin precursor (P20160); Beta-2-microglobulin precursor (P61769); Bone marrow proteoglycan precursor Contains: Eosinophil granule major basic protein (P13727); Calpain small subunit 1 (P04632); Calreticulin precursor (P27797); Caspase-3 precursor (P42574); Catalase (P04040); Cell division control protein 42 homolog precursor (P60953); Cofilin-1 (P23528); Crk-like protein (P46109); Cytochrome b-245 heavy chain (P04839); Dedicator of cytokinesis protein 3 (Q8IZD9); Delta-aminolevulinic acid dehydratase (P13716); Endoplasmic precursor (P14625); Eosinophil peroxidase precursor (P11678); Galectin-10 (Q05315); -3 (P17931); Gelsolin precursor (P06396); Glutathione peroxidase 1 (P07203); Glutathione synthetase (P48637); Growth factor receptor-bound protein 2 (P62993); Guanine nucleotide-binding protein G(i), alpha-2 subunit (P04899); Guanine nucleotide-binding protein G(o) subunit alpha (P08754); Guanine nucleotide-binding protein subunit beta-2-like 1 (P63244); Heat shock 70 kDa protein 4 (P34932); High mobility group protein B1 (P09429); Integrin alpha-M precursor (P11215); Integrin beta-2 precursor (P05107); Keratin, type II cytoskeletal 1 (P04264); Galectin Keratin, type II cytoskeletal 2 epidermal (P35908); Lactotransferrin precursor (P02788); Leukocyte elastase precursor (P08246); Macrophage migration inhibitory factor (P14174); Macrophage-capping protein (P40121); Mitogen-activated protein kinase 1 (P28482); Moesin (P26038); Myeloblastin precursor (P24158); Myeloperoxidase precursor (P05164); Myosin-9 (P35579); Neutrophil cytosol factor 1 (P14598); Neutrophil cytosol factor 2 (P19878); Neutrophil gelatinase-associated lipocalin precursor (P80188); Peptidyl-prolyl cis-trans isomerase B precursor (P23284); Peroxiredoxin-1 (Q06830); Peroxiredoxin-2 (P32119); Peroxiredoxin-5, mitochondrial precursor (P30044); Peroxiredoxin-6 (P30041); Plastin-2 (P13796); Platelet-activating factor acetylhydrolase IB subunit alpha (P43034); Prohibitin (P35232); Proteasome activator complex subunit 1 (Q06323); Proteasome activator complex subunit 2 (Q9UL46); Proteasome subunit beta type-8 precursor (P28062); Proteasome subunit beta type-9 precursor (P28065); Protein diaphanous homolog 1 (O60610); Protein disulfide-isomerase A3 (P30101); Protein S100-A8 (P05109); Protein S100-A8 (P06702); Ras-related C3 botulinum toxin substrate 2 precursor (P15153); Serum albumin precursor (P02768); Stathmin (P16949); Superoxide dismutase [Mn], mitochondrial precursor (P04179); Talin-1 (Q9Y490); Thioredoxin (P10599); Thioredoxin reductase 1, cytoplasmic (Q16881); Transforming protein RhoA precursor (P61586); Translationally-controlled tumor protein (P13693); Transthyretin precursor (P02766); Tyrosine-protein

**Supplemental Table S1 (Continued). Identified proteins categorized according to disease or function from Fig. 5**

kinase CSK (P41240); Tyrosine-protein phosphatase non-receptor type 6 (P29350); Ubiquitin-conjugating enzyme E2 N (P61088); Vasodilator-stimulated phosphoprotein (P50552); Vimentin (P08670); Vinculin (P18206) Tyrosine-protein phosphatase non-receptor type 6 (P29350); Ubiquitin-conjugating enzyme E2 N (P61088); Vasodilator-stimulated phosphoprotein (P50552); Vimentin (P08670); Vinculin (P18206)

**Cellular Movement**

14-3-3 protein epsilon (P62258); 40S ribosomal protein SA (P08865); Actin, cytoplasmic 2 (Gamma-actin) (P63261); Actin-related protein 2/3 complex subunit 1B (O15143); Actin-related protein 2/3 complex subunit 2 (O15144); Actin-related protein 2/3 complex subunit 3 (O15145); Actin-related protein 2/3 complex subunit 5-like protein (O15511); Adenylyl cyclase-associated protein 1 (Q01518); Alpha-1-antichymotrypsin precursor (P01011); Alpha-1-antitrypsin precursor (P01009); Alpha-actinin-4 (O43707); Annexin A1 (P04083); Annexin A2 (P07355); Azurocidin precursor (P20160); Beta-2-microglobulin precursor (P61769); Calpain small subunit 1 (P04632); Calreticulin precursor (P27797); Cathepsin D precursor (P07339); CD97 antigen precursor (Leukocyte antigen CD97) (P48960); Cell division control protein 42 homolog precursor (P60953); Cofilin-1 (P23528); Crk-like protein (P46109); Dextrin (P60981); Docking protein 2 (O60496); Dynactin subunit 2 (Q13561); Dynamin-2 (P50570); Eosinophil peroxidase precursor (P11678); Ezrin (P15311); F-actin-capping protein subunit alpha-1 (P52907); F-actin-capping protein subunit alpha-2 (P08754); F-actin-capping protein subunit beta (P47756); Fibrinogen beta chain precursor (P02675); Galectin-10 (Q05315); Galectin-3 (P17931); Gelsolin precursor (P06396); Glucose-6-phosphate 1-dehydrogenase (P11413); Glucose-6-phosphate isomerase (P06744); Guanine nucleotide-binding protein G(i), alpha-2 subunit (P04899); Guanine nucleotide-binding protein G(l)/G(s)/G(t) subunit beta-2 (P62879); Guanine nucleotide-binding protein G(o) subunit alpha (P08754); Guanine nucleotide-binding protein subunit beta-2-like 1 (P63244); Heat shock 70 kDa protein 4 (P34932); Heat shock protein HSP 90-alpha (P07900); Heat shock protein HSP 90-beta (P08238); High mobility group protein B1 (P09429); Integrin alpha-M precursor (P11215); Integrin beta-2 precursor (P05107); Keratin, type I cytoskeletal 10 (P13645); Leukocyte elastase precursor (P08246); LIM and SH3 domain protein 1 (Q14847); Macrophage migration inhibitory factor (P14174); Mitogen-activated protein kinase 1 (P28482); Moesin (P26038); Monoglyceride lipase (Q99685); Myeloblastin precursor (P24158); Myeloperoxidase precursor (P05164); Myosin-11 (P35749); Myosin-9 (P35579); Neutrophil defensin 1 precursor (P59665); Neutrophil gelatinase-associated lipocalin precursor (P80188); Nucleoside diphosphate kinase A (P15531); Nucleoside diphosphate kinase B (P22392); Peptidyl-prolyl cis-trans isomerase A (P62937); Peptidyl-prolyl cis-trans isomerase B precursor (P23284); Phosphatidylethanolamine-binding protein 1 (P30086); Platin-2 (P13796); Platelet-activating factor acetylhydrolase IB subunit alpha (P43034); Prohibitin (P35232); Protein diaphanous homolog 1 (O60610); Protein S100-A4 (P26447); Protein S100-A8 (P05109); Protein S100-A8 (P06702); Ras-related C3 botulinum toxin substrate 2 precursor (P15153); Rho GDP-dissociation inhibitor 1 (P52565); Rho GDP-dissociation inhibitor 2 (P52566); Stathmin (P16949); Thioredoxin (P10599); Transforming protein RhoA precursor (P61586); Translationally-controlled tumor protein (P13693); Tropomodulin-3 (Q9NYL9); Tropomyosin alpha-3 chain (P06753); Tryptophanyl-tRNA synthetase, cytoplasmic (P23381); Tubulin beta chain (P68363); Tyrosine-protein kinase CSK (P41240); Tyrosine-protein phosphatase non-receptor type 6 (P29350); Tyrosyl-tRNA synthetase, cytoplasmic (P54577); Vasodilator-stimulated phosphoprotein (P50552); Vimentin (P08670); Vinculin (P18206).

**Immune Response**

Actin-related protein 2 (P61160); Actin-related protein 3 (P61158); AH receptor-interacting protein (O00170); Alpha-1-antichymotrypsin precursor (P01011); Alpha-1-antitrypsin precursor (P01009); Annexin A1 (P04083); Annexin A11 (P50995); Annexin A3 (P12429); Apoptosis-associated speck-like protein containing a CARD (Q9ULZ3); Arachidonate 15-lipoxygenase (P16050); Azurocidin precursor (P20160); Beta-2-microglobulin precursor (P61769); Bone marrow proteoglycan precursor Contains: Eosinophil granule major basic protein (P13727); Calcium signal-modulating cyclophilin ligand (P49069); Calreticulin precursor (P27797); Caspase-3 precursor (P42574); CD97 antigen precursor (Leukocyte antigen CD97) (P48960); Cell division control

**Supplemental Table S1 (Continued). Identified proteins categorized according to disease or function from Fig. 5.**

protein 42 homolog precursor (P60953); Cofilin-1 (P23528); Crk-like protein (P46109); Cytochrome b-245 heavy chain (P04839); Dipeptidyl-peptidase 1 precursor (P53634); Endoplasmic precursor (P14625); Eosinophil peroxidase precursor (P11678); Fibrinogen beta chain precursor (P02675); Galectin-10 (Q05315); Galectin-3 (P17931); Gelsolin precursor (P06396); Guanine nucleotide-binding protein G(i), alpha-2 subunit (P04899); Guanine nucleotide-binding protein G(o) subunit alpha (P08754); Heat shock 70 kDa protein 4 (P34932); High mobility group protein B1 (P09429); Integrin alpha-M precursor (P11215); Integrin beta-2 precursor (P05107); Keratin, type I cytoskeletal 10 (P13645); Lactotransferrin precursor (P02788); Leukocyte elastase precursor (P08246); Lysozyme C precursor (P61626); Macrophage migration inhibitory factor (P14174); Macrophage-capping protein (P40121); Mitogen-activated protein kinase 1 (P28482); Monoglyceride lipase (Q99685); Myeloblastin precursor (P24158); Myeloperoxidase precursor (P05164); Neutrophil cytosol factor 4 (Q15080); Neutrophil defensin 1 precursor (P59665); Neutrophil gelatinase-associated lipocalin precursor (P80188); Peptidyl-prolyl cis-trans isomerase A (P62937); Peptidyl-prolyl cis-trans isomerase B precursor (P23284); Peroxiredoxin-5, mitochondrial precursor (P30044); Phospholipid hydroperoxide glutathione peroxidase, mitochondrial precursor (P36969); Proteasome activator complex subunit 1 (Q06323); Proteasome activator complex subunit 2 (Q9UL46); Proteasome subunit beta type-8 precursor (P28062); Proteasome subunit beta type-9 precursor (P28065); Protein diaphanous homolog 1 (O60610); Protein S100-A12 (P80511); Protein S100-A8 (P05109); Protein S100-A8 (P06702); Ras-related C3 botulinum toxin substrate 2 precursor (P15153); Ras-related protein Rab-27A (P51159); Rho GDP-dissociation inhibitor 2 (P52566); Thioredoxin (P10599); Transforming protein RhoA precursor (P61586); Translationally-controlled tumor protein (P13693); Tyrosine-protein kinase CSK (P41240); Tyrosine-protein phosphatase non-receptor type 6 (P29350); Tyrosyl-tRNA synthetase, cytoplasmic (P54577); Ubiquitin-conjugating enzyme E2 N (P61088)

**Immunological Disease**

40S ribosomal protein SA (P08865); 78 kDa glucose-regulated protein precursor (P11021); Actin, cytoplasmic 1 (beta actin) (P60709); Adenylosuccinate synthetase isozyme 3 Cytochrome b-c1 complex subunit 2, mitochondrial precursor (P22695); ADP-ribosylation factor 1 (P84077); Aldehyde dehydrogenase, mitochondrial precursor (P05091); Alpha-enolase (P06733); Annexin A1 (P04083); Annexin A3 (P12429); Annexin A5 (P08758); Beta-2-microglobulin precursor (P61769); Beta-galactosidase precursor (P16279); Caspase-3 precursor (P42574); Catalase (P04040); CD97 antigen precursor (Leukocyte antigen CD97) (P48960); Cytidine deaminase (P32320); Cytochrome b-245 heavy chain (P04839); Docking protein 2 (O60496); Elongation factor 1-gamma (P26641); Elongation factor 2 (P13639); Endoplasmic precursor (P14625); Far upstream element-binding protein 1 (Q96AE4); Fructose-bisphosphate aldolase A (Q9UCN2); Galectin-3 (P17931); Gelsolin precursor (P06396); Glutathione peroxidase 1 (P07203); Glutathione reductase, mitochondrial precursor (P00390); Grancalcin (P28676); Guanine nucleotide-binding protein G(I)/G(S)/G(T) subunit beta-2 (P62879); Heat shock cognate 71 kDa protein (P11142); Heterogeneous nuclear ribonucleoprotein A1 (P09651); Heterogeneous nuclear ribonucleoprotein A3 (P51991); Histone H2A type 1-C (Q93077); Integrin alpha-M precursor (P11215); Integrin beta-2 precursor (P05107); Lactotransferrin precursor (P02788); Lactoylglutathione lyase (Q04760); Lamin-B1 (P20700); Leukocyte elastase precursor (P08246); L-lactate dehydrogenase B chain (P07195); Lysozyme C precursor (P61626); Macrophage migration inhibitory factor (P14174); Moesin (P26038); Myeloblastin precursor (P24158); Myeloperoxidase precursor (P05164); Myosin regulatory light chain (P19105); Myosin-9 (P35579); Neutrophil cytosol factor 2 (P19878); Neutrophil cytosol factor 4 (Q15080); Neutrophil defensin 1 precursor (P59665); Nucleoside diphosphate kinase A (P15531); Peptidyl-prolyl cis-trans isomerase A (P62937); Peroxiredoxin-1 (Q06830); Peroxiredoxin-2 (P32119); Peroxiredoxin-6 (P30041); Plastin-2 (P13796); Proteasome subunit beta type-9 precursor (P28065); Protein diaphanous homolog 1 (O60610); Protein disulfide-isomerase A3 (P30101); Protein disulfide-isomerase precursor (P07237); Protein phosphatase 1 regulatory subunit 7 (Q15435); Protein S100-A12 (P80511); Protein S100-A8 (P05109); Protein S100-A8 (P06702); Protein-arginine deiminase type-4 (Q9UM07); Purine nucleoside phosphorylase (P00491); Ras-related C3 botulinum toxin substrate 2 precursor (P15153); Ras-related

**Supplemental Table S1 (Continued). Identified proteins categorized according to disease or function from Fig. 5.**

protein Rab-27A (P51159); Ras-related protein Rab-2A (P61019); Rho GDP-dissociation inhibitor 1 (P52565); Serum albumin precursor (P02768); Staphylococcal nuclease domain-containing protein 1 (Q7KZF4); Superoxide dismutase [Mn], mitochondrial precursor (P04179); Thioredoxin (P10599); Transketolase (P29401); Triosephosphate isomerase (P60174); Tubulin beta chain (P68363); Vasodilator-stimulated phosphoprotein (P50552); Vimentin (P08670)

**Inflammatory Disease**

40S ribosomal protein SA (P08865); 78 kDa glucose-regulated protein precursor (P11021); Adenine phosphoribosyltransferase (P07741); Adenylosuccinate synthetase isozyme 4 Cytochrome b-c1 complex subunit 2, mitochondrial precursor (P22695); ADP-ribosylation factor 1 (P84077); Alpha-1-antitrypsin precursor (P01009); Alpha-enolase (P06733); Azurocidin precursor (P20160);

**Supplemental Table S1 (Continued). Identified proteins categorized according to disease or function from Fig. 5.**

Beta-2-microglobulin precursor (P61769); Beta-hexosaminidase subunit beta precursor (P07686); Bone marrow proteoglycan precursor Contains: Eosinophil granule major basic protein (P13727); Carbonic anhydrase 1 (P00915); Carbonic anhydrase 2 (P00918); Caspase-3 precursor (P42574); Cathepsin D precursor (P07339); CD97 antigen precursor (Leukocyte antigen CD97) (P48960); Cytidine deaminase (P32320); Cytochrome b-245 heavy chain (P04839); Dipeptidyl-peptidase 1 precursor (P53634); Docking protein 2 (O60496); Elongation factor 1-gamma (P26641); Elongation factor 2 (P13639); Endoplasmic precursor (P14625); Fibrinogen beta chain precursor (P02675); Fructose-bisphosphate aldolase A (Q9UCN2); Galectin-3 (P17931); Glucose-6-phosphate isomerase (P06744); Glutathione reductase, mitochondrial precursor (P00390); Glutathione synthetase (P48637); Glyceraldehyde-3-phosphate dehydrogenase (P04406); Grancalcin (P28676); Guanine nucleotide-binding protein G(i), alpha-2 subunit (P04899); Guanine nucleotide-binding protein G(l)/G(s)/G(t) subunit beta-2 (P62879); Heat shock cognate 71 kDa protein (P11142); Heterogeneous nuclear ribonucleoprotein A1 (P09651); Heterogeneous nuclear ribonucleoprotein A3 (P51991); High mobility group protein B1 (P09429); Histone H2A type 1-C (Q93077); Integrin beta-2 precursor (P05107); Lactotransferrin precursor (P02788); Leukocyte elastase precursor (P08246); L-lactate dehydrogenase B chain (P07195); Lysozyme C precursor (P61626); Macrophage migration inhibitory factor (P14174); Myeloblastin precursor (P24158); Myeloperoxidase precursor (P05164); Myosin regulatory light chain (P19105); Neutrophil cytosol factor 4 (Q15080); Neutrophil defensin 1 precursor (P59665); Peptidyl-prolyl cis-trans isomerase A (P62937); Peroxiredoxin-1 (Q06830); Peroxiredoxin-2 (P32119); Plastin-2 (P13796); Proteasome subunit beta type-9 precursor (P28065); Protein disulfide-isomerase A3 (P30101); Protein phosphatase 1 regulatory subunit 7 (Q15435); Protein S100-A11 (P31949); Protein S100-A12 (P80511); Protein S100-A8 (P05109); Protein S100-A8 (P06702); Protein-arginine deiminase type-4 (Q9UM07); Ras-related protein Rab-2A (P61019); Serum albumin precursor (P02768); Staphylococcal nuclease domain-containing protein 1 (Q7KZF4); Stathmin (P16949); Superoxide dismutase [Mn], mitochondrial precursor (P04179); Thioredoxin (P10599); Transitional endoplasmic reticulum ATPase (P55072); Tyrosine-protein kinase CSK (P41240); Tyrosine-protein phosphatase non receptor type 6 (P29350); Vimentin (P08670).

**Respiratory Disease**

14-3-3 protein epsilon (P62258); 78 kDa glucose-regulated protein precursor (P11021); Actin, cytoplasmic 1 (beta actin) (P60709); Aldehyde dehydrogenase, mitochondrial precursor (P05091); Alpha-1-antitrypsin precursor (P01009); Alpha-enolase (P06733); Annexin A3 (P12429); Bone marrow proteoglycan precursor Contains: Eosinophil granule major basic protein (P13727); Caspase-3 precursor (P42574); Cytochrome b-245 heavy chain (P04839); Endoplasmic precursor (P14625); Fructose-bisphosphate aldolase A (Q9UCN2); Gelsolin precursor (P06396); Glucose-6-phosphate isomerase (P06744); Glyceraldehyde-3-phosphate dehydrogenase (P04406); Heat shock protein HSP 90-alpha (P07900); Heat shock protein HSP 90-beta (P08238);

**Supplemental Table S1 (Continued). Identified proteins categorized according to disease or function from Fig. 5.**

Integrin beta-2 precursor (P05107); L-lactate dehydrogenase A chain (P00338); Lactotransferrin precursor (P02788); Leukocyte elastase precursor (P08246); Myeloperoxidase precursor (P05164); Myosin-9 (P35579); Peroxiredoxin-1 (Q06830); Peroxiredoxin-6 (P30041); Proliferating cell nuclear antigen (P12004); Protein disulfide-isomerase A3 (P30101); Protein disulfide-isomerase precursor (P07237); Serum albumin precursor (P02768); Transketolase (P29401); Triosephosphate isomerase (P60174); Tubulin beta chain (P68363)

**Supplemental Table S2. Identified proteins categorized according to canonical pathways from Fig. 7.**

**Actin Cytoskeleton Signaling**

Actin, cytoplasmic 1 (P60709); Actin, cytoplasmic 2 (P63261); Actin-related protein 2 (P61160); Actin-related protein 2/3 complex subunit 1B (O15143); Actin-related protein 2/3 complex subunit 2 (O15144); Actin-related protein 2/3 complex subunit 3 (O15145); Actin-related protein 2/3 complex subunit 4 (P59998); Actin-related protein 2/3 complex subunit 5 (O15511); Actin-related protein 3 (P61158); Alpha-actinin-1 (P12814); Alpha-actinin-4 (O43707); Cell division control protein 42 homolog precursor (P60953); Cofilin-1 (P23528); Cofilin-2 (Q9Y281); Crk-like protein (P46109); Ezrin (P15311); Gelsolin precursor (P06396); Growth factor receptor-bound protein 2 (P62993); Mitogen-activated protein kinase 1 (P28482); Mitogen-activated protein kinase 3 (P27361); Moesin (P26038); Myosin light polypeptide 6 (P60660); Myosin-11 (P35749); Myosin-7B (A7E2Y1); Myosin-9 (P35579); Profilin-1 (P07737); Protein diaphanous homolog 1 (O60610); Ras-related C3 botulinum toxin substrate 2 precursor (P15153); Serine/threonine-protein phosphatase PP1-alpha catalytic subunit (P62136); Serine/threonine-protein phosphatase PP1-beta catalytic subunit (P62140); Transforming protein RhoA precursor (P61586); Tyrosine-protein kinase CSK (P41240); Vinculin (P18206)

**Axonal Guidance Signaling**

Actin-related protein 2 (P61160); Actin-related protein 2/3 complex subunit 1B (O15143); Actin-related protein 2/3 complex subunit 2 (O15144); Actin-related protein 2/3 complex subunit 3 (O15145); Actin-related protein 2/3 complex subunit 4 (P59998); Actin-related protein 2/3 complex subunit 5 (O15511); Actin-related protein 3 (P61158); Cell division control protein 42 homolog precursor (P60953); Cofilin-1 (P23528); Cofilin-2 (Q9Y281); Crk-like protein (P46109); Growth factor receptor-bound protein 2 (P62993); Guanine nucleotide-binding protein G(i), alpha-2 subunit (P04899); Guanine nucleotide-binding protein G(l)/G(s)/G(t); subunit beta-2 (P62879); Guanine nucleotide-binding protein G(k) subunit alpha (P08754); Guanine nucleotide-binding protein G(o) subunit alpha (P09471); Guanine nucleotide-binding protein subunit beta-2-like 1 (P63244); Mitogen-activated protein kinase 1 (P28482); Mitogen-activated protein kinase 3 (P27361); Myosin light polypeptide 6 (P60660); Profilin-1 (P07737); Ras-related C3 botulinum toxin substrate 2 precursor (P15153); Ras-related protein Rap-1b precursor (P61224); Transforming protein RhoA precursor (P61586); Vasodilator-stimulated phosphoprotein (P50552)

**Ephrin Receptor Signaling**

Actin-related protein 2 (P61160); Actin-related protein 2/3 complex subunit 1B (O15143); Actin-related protein 2/3 complex subunit 2 (O15144); Actin-related protein 2/3 complex subunit 3 (O15145); Actin-related protein 2/3 complex subunit 4 (P59998); Actin-related protein 2/3 complex subunit 5 (O15511); Actin-related protein 3 (P61158); Cell division control protein 42 homolog precursor (P60953); Cofilin-1 (P23528); Cofilin-2 (Q9Y281); Crk-like protein (P46109); Growth factor receptor-bound protein 2 (P62993); Guanine nucleotide-binding protein G(i), alpha-2 subunit (P04899); Guanine nucleotide-binding protein G(l)/G(s)/G(t); subunit beta-2 (P62879); Guanine nucleotide-binding protein G(k) subunit alpha (P08754); Guanine nucleotide-binding protein G(o) subunit alpha (P09471); Guanine nucleotide-binding protein subunit beta-2-like 1 (P63244); Mitogen-activated protein kinase 1 (P28482); Mitogen-activated protein kinase 3 (P27361); Ras-related C3 botulinum toxin substrate 2 precursor (P15153); Ras-related protein Rap-1b precursor (P61224); Transforming protein RhoA precursor (P61586)



**Supplemental Table S2 (Continued). Identified proteins categorized according to canonical pathways from Fig. 7.****ERK/MAPK Signaling**

14-3-3 protein beta/alpha (P31946); 14-3-3 protein gamma (P61981); 14-3-3 protein theta (P27348); 14-3-3 protein zeta/delta (P63104); Crk-like protein (P46109); Growth factor receptor-bound protein 2 (P62993); Mitogen-activated protein kinase 1 (P28482); Mitogen-activated protein kinase 3 (P27361); Mitogen-activated protein kinase scaffold protein 1 (Q9UHA4); Protein phosphatase 1 regulatory subunit 7 (Q15435); Ras-related C3 botulinum toxin substrate 2 precursor (P15153); Ras-related protein Rap-1b precursor (P61224); Serine/threonine-protein phosphatase 2A 65 kDa regulatory subunit A alpha isoform (P30153); Serine/threonine-protein phosphatase 2A catalytic subunit alpha isoform (P67775); Serine/threonine-protein phosphatase PP1-alpha catalytic subunit (P62136); Serine/threonine-protein phosphatase PP1-beta catalytic subunit (P62140); Talin-1 (Q9Y490)

**Integrin Signaling**

Actin, cytoplasmic 1 (P60709); Actin, cytoplasmic 2 (P63261); Actin-related protein 2 (P61160); Actin-related protein 2/3 complex subunit 1B (O15143); Actin-related protein 2/3 complex subunit 2 (O15144); Actin-related protein 2/3 complex subunit 3 (O15145); Actin-related protein 2/3 complex subunit 4 (P59998); Actin-related protein 2/3 complex subunit 5 (O15511); Actin-related protein 3 (P61158); ADP-ribosylation factor 1 (P84077); ADP-ribosylation factor 3 (P61204); Alpha-actinin-1 (P12814); Alpha-actinin-4 (O43707); Calpain small subunit 1 (P04632); Cell division control protein 42 homolog precursor (P60953); Crk-like protein (P46109); Growth factor receptor-bound protein 2 (P62993); Integrin alpha-M precursor (P11215); Integrin beta-2 precursor (P05107); Mitogen-activated protein kinase 1 (P28482); Mitogen-activated protein kinase 3 (P27361); Myosin regulatory light chain MRLC3 (P19105); Ras-related C3 botulinum toxin substrate 2 precursor (P15153); Ras-related protein Rap-1b precursor (P61224); Serine/threonine-protein phosphatase PP1-alpha catalytic subunit (P62136); Serine/threonine-protein phosphatase PP1-beta catalytic subunit (P62140); Talin-1 (Q9Y490); Transforming protein RhoA precursor (P61586); Vasodilator-stimulated phosphoprotein (P50552); Vinculin (P18206)

**Leukocyte Extravasation Signaling**

Actin, cytoplasmic 1 (P60709); Actin, cytoplasmic 2 (P63261); Alpha-actinin-1 (P12814); Alpha-actinin-4 (O43707); Cell division control protein 42 homolog precursor (P60953); Crk-like protein (P46109); Cytochrome b-245 heavy chain (P04839); Ezrin (P15311); Guanine nucleotide-binding protein G(i), alpha-2 subunit (P04899); Guanine nucleotide-binding protein G(k) subunit alpha (P08754); Integrin alpha-M precursor (P11215); Integrin beta-2 precursor (P05107); Moesin (P26038); Myosin light polypeptide 6 (P60660); Neutrophil cytosol factor 2 (P19878); Neutrophil cytosol factor 4 (Q15080); Ras-related C3 botulinum toxin substrate 2 precursor (P15153); Ras-related protein Rap-1b precursor (P61224); Rho GTPase-activating protein 1 (Q07960); Transforming protein RhoA precursor (P61586); Vasodilator-stimulated phosphoprotein (P50552); Vinculin (P18206)

**NRF2-mediated Oxidative Stress Response**

Actin, cytoplasmic 1 (P60709); Actin, cytoplasmic 2 (P63261); Alcohol dehydrogenase [NADP+] (P14550); Carbonyl reductase (P16152); Catalase (P04040); Endoplasmic reticulum protein ERp29 precursor (P30040); Ferritin light chain (P02792); Glutathione reductase, mitochondrial precursor (P00390); Glutathione S-transferase A1 (P08263); Glutathione S-transferase omega-1 (P78417); Glutathione S-transferase P (P09211); Mitogen-activated protein kinase 1 (P28482); Mitogen-activated protein kinase 3

**Supplemental Table S2 (Continued). Identified proteins categorized according to canonical pathways from Fig. 7.**

(P27361); Peptidyl-prolyl cis-trans isomerase B (P23284 ); Peroxiredoxin-1 (Q06830); Stress-induced-phosphoprotein 1 (P31948); Superoxide dismutase [Mn], mitochondrial precursor (P04179); Thioredoxin (P10599); Thioredoxin reductase 1, cytoplasmic (Q16881); Transitional endoplasmic reticulum ATPase (P55072)

**VEGF Signaling**

14-3-3 protein epsilon (P62258); Actin, cytoplasmic 1 (P60709); Actin, cytoplasmic 2 (P63261); Alpha-actinin-1 (P12814); Alpha-actinin-4 (O43707); Growth factor receptor-bound protein 2 (P62993); Mitogen-activated protein kinase 1 (P28482); Mitogen-activated protein kinase 3 (P27361); Vinculin (P18206)
